# Supplementary material for: Substrate Stiffness Regulates Cholesterol Efflux in Smooth Muscle Cells
Source: Frontiers journal article supplement (doi:10.3389/fcell.2021.648715), 2021-05-18
Supplement: Image_1.pdf [file Image_1.pdf]

## Supplementary Material

### 1 SUPPLEMENTARY FIGURE

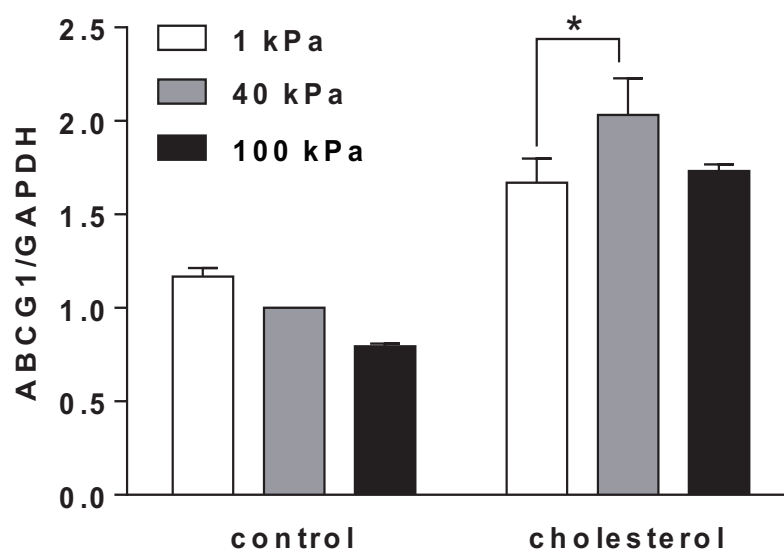

**Figure S1.** The expression of cholesterol efflux gene ABCG1 in SMCs. ABCG1 gene expression level was measured by RT-qPCR. GAPDH was used as the internal control for normalization ( $n = 3$ ). \* indicates  $p < 0.05$ .
